# Supplementary material
Source: publisher site journal article supplement (https://www.dovepress.com/article/288587)
Supplement: Supplementary file 1 [file get_supplementary_file.php]

**Supplementary Table 1. The LD analysis for five SNPs (rs4712524, rs10946398, rs7754840, rs9460546 and rs7756992) located in *CDKAL1***

| D' | rs10946398 | rs7754840 | rs9460546 | rs7756992 |
| --- | --- | --- | --- | --- |
| rs4712524 | 0.983 | 0.976 | 0.940 | 0.831 |
| rs10946398 | - | 0.978 | 0.954 | 0.856 |
| rs7754840 | - | - | 0.946 | 0.856 |
| rs9460546 | - | - | - | 0.817 |

**Supplementary Table 2. The LD analysis for three SNPs (****rs1111875, rs5015480 and rs7923837)**

**located in *HHEX***

| D | rs5015480 | rs7923837 |
| --- | --- | --- |
| rs1111875 | 0.938 | 0.490 |
| rs5015480 | - | 0.729 |

**Supplementary Table 3. Different inheritance models analysis of the SNP rs9460546 in *CDKAL1* between the NDM and T2DM group.**

| Model | Genotype | NDM | T2DM | OR (95% CI) | *P* | AIC | BIC |
| --- | --- | --- | --- | --- | --- | --- | --- |
| Codominant | T/T | 471 (36.9%) | 392 (33.5%) | 1 | 0.099 | 3390.0 | 3419.0 |
| G/T | 600 (47%) | 557 (47.6%) | 1.12 (0.94-1.34) |
| G/G | 206 (16.1%) | 220 (18.8%) | 1.29 (1.02-1.62) |
| Dominant | T/T | 471 (36.9%) | 392 (33.5%) | 1 | 0.074 | 3389.4 | 3412.6 |
| G/T-G/G | 806 (63.1%) | 777 (66.5%) | 1.16 (0.99-1.38) |
| Recessive | T/T-G/T | 1071 (83.9%) | 949 (81.2%) | 1 | 0.083 | 3389.6 | 3412.8 |
| G/G | 206 (16.1%) | 220 (18.8%) | 1.20 (0.98-1.48) |
| Overdominant | T/T-G/G | 677 (53%) | 612 (52.4%) | 1 | 0.690 | 3392.4 | 3415.7 |
| G/T | 600 (47%) | 557 (47.6%) | 1.03 (0.88-1.21) |
| Log-additive | --- | --- | --- | 1.13 (1.01-1.27) | 0.032 | 3388.0 | 3411.2 |

**Supplementary Table 4. Different inheritance models analysis of the** **SNP rs7756992** **in *CDKAL1* between the NDM and T2DM group.**

| Model | Genotype | NDM | T2DM | OR (95% CI) | *P* | AIC | BIC |
| --- | --- | --- | --- | --- | --- | --- | --- |
| Codominant | G/G | 294 (23%) | 319 (27.3%) | 1 | 0.038 | 3388.0 | 3417.1 |
| G/A | 658 (51.5%) | 583 (49.9%) | 0.82 (0.67-0.99) |
| A/A | 325 (25.4%) | 267 (22.8%) | 0.75 (0.60-0.95) |
| Dominant | G/G | 294 (23%) | 319 (27.3%) | 1 | 0.015 | 3386.7 | 3409.9 |
| G/A-A/A | 983 (77%) | 850 (72.7%) | 0.80 (0.66-0.96) |
| Recessive | G/G-G/A | 952 (74.5%) | 902 (77.2%) | 1 | 0.120 | 3390.2 | 3413.4 |
| A/A | 325 (25.4%) | 267 (22.8%) | 0.86 (0.72-1.04) |
| Overdominant | G/G-A/A | 619 (48.5%) | 586 (50.1%) | 1 | 0.430 | 3392.0 | 3415.2 |
| G/A | 658 (51.5%) | 583 (49.9%) | 0.94 (0.80-1.10) |
| Log-additive | --- | --- | --- | 0.87 (0.77-0.97) | 0.014 | 3386.6 | 3409.8 |

**Supplementary Table 5. Different inheritance models analysis of the SNP rs1111875 in *HHEX* between the** **NDM and T2DM group.**

| Model | Genotype | NDM | T2DM | OR (95% CI) | *P* | AIC | BIC |
| --- | --- | --- | --- | --- | --- | --- | --- |
| Codominant | T/T | 669 (52.4%) | 577 (49.4%) | 1 | 0.044 | 3388.3 | 3417.4 |
| C/T | 525 (41.1%) | 486 (41.6%) | 1.07 (0.91-1.27) |
| C/C | 83 (6.5%) | 106 (9.1%) | 1.48 (1.09-2.01) |
| Dominant | T/T | 669 (52.4%) | 577 (49.4%) | 1 | 0.130 | 3390.3 | 3413.6 |
| C/T-C/C | 608 (47.6%) | 592 (50.6%) | 1.13 (0.96-1.32) |
| Recessive | T/T-C/T | 1194 (93.5%) | 1063 (90.9%) | 1 | 0.019 | 3387.1 | 3410.3 |
| C/C | 83 (6.5%) | 106 (9.1%) | 1.43 (1.06-1.93) |
| Overdominant | T/T-C/C | 752 (58.9%) | 683 (58.4%) | 1 | 0.800 | 3392.5 | 3415.7 |
| C/T | 525 (41.1%) | 486 (41.6%) | 1.02 (0.87-1.20) |
| Log-additive | --- | --- | --- | 1.15 (1.01-1.30) | 0.029 | 3387.8 | 3411.0 |

**Supplementary Table 6. Different inheritance models analysis of the rs7923837 in *HHEX* between the NDM and T2DM group.**

| Model | Genotype | NDM | T2DM | OR (95% CI) | *P* | AIC | BIC |
| --- | --- | --- | --- | --- | --- | --- | --- |
| Codominant | A/A | 740 (58%) | 656 (56.1%) | 1 | 0.250 | 3391.8 | 3420.8 |
| G/A | 479 (37.5%) | 443 (37.9%) | 1.05 (0.88-1.23) |
| G/G | 58 (4.5%) | 70 (6%) | 1.36 (0.94-1.96) |
| Dominant | A/A | 740 (58%) | 656 (56.1%) | 1 | 0.350 | 3391.7 | 3414.9 |
| G/A-G/G | 537 (42%) | 513 (43.9%) | 1.08 (0.92-1.27) |
| Recessive | A/A-G/A | 1219 (95.5%) | 1099 (94%) | 1 | 0.110 | 3390.1 | 3413.3 |
| G/G | 58 (4.5%) | 70 (6%) | 1.34 (0.93-1.91) |
| Overdominant | A/A-G/G | 798 (62.5%) | 726 (62.1%) | 1 | 0.830 | 3392.6 | 3415.8 |
| G/A | 479 (37.5%) | 443 (37.9%) | 1.02 (0.86-1.20) |
| Log-additive | --- | --- | --- | 1.10 (0.96-1.25) | 0.170 | 3390.7 | 3413.9 |

**Supplementary Table 7. Comparison of glucose and lipid metabolic parameters for each SNP’s different genotype in NDM group**

| SNP | genotype | TC(mmol/l) | *P* | TG(mmol/l) | *P* | HDL-C(mmol/l) | *P* | LDL-C(mmol/l) | *P* | FPG(mmol/l) | *P* | HbA1C(%) | *P* |
| --- | --- | --- | --- | --- | --- | --- | --- | --- | --- | --- | --- | --- | --- |
|  | A/A | 4.535±1.042 |  | 1.791±1.344 |  | 1.262±0.363 |  | 2.642±0.897 |  | 5.023±0.535 |  | 5.141±0.360 |  |
| rs4712524 | A/G | 4.482±1.076 | 0.538 | 1.778±1.449 | 0.374 | 1.296±0.414 | 0.357 | 2.584±0.817 | 0.170 | 4.983±0.523 | 0.319 | 5.130±0.339 | 0.490 |
|  | G/G | 4.573±0.977 |  | 1.635±0.998 |  | 1.276±0.298 |  | 2.711±0.802 |  | 5.037±0.513 |  | 5.164±0.325 |  |
|  | A/A | 4.510±1.067 |  | 1.815±1.358 |  | 1.260±0.359 |  | 2.649±0.891 |  | 5.023±0.535 |  | 5.140±0.357 |  |
| rs10946398 | C/A | 4.499±1.056 | 0.633 | 1.757±1.420 | 0.276 | 1.294±0.413 | 0.314 | 2.588±0.816 | 0.289 | 4.987±0.524 | 0.436 | 5.136±0.338 | 0.917 |
|  | C/C | 4.593±0.967 |  | 1.615±1.008 |  | 1.289±0.296 |  | 2.691±0.818 |  | 5.029±0.508 |  | 5.149±0.337 |  |
|  | G/G | 4.495±1.077 |  | 1.826±1.361 |  | 1.259±0.361 |  | 2.644±0.892 |  | 5.020±0.535 |  | 5.140±0.358 |  |
| rs7754840 | C/G | 4.496±1.049 | 0.270 | 1.750±1.421 | 0.246 | 1.295±0.411 | 0.285 | 2.576±0.811 | 0.050 | 4.984±0.519 | 0.262 | 5.135±0.338 | 0.843 |
|  | C/C | 4.646±0.962 |  | 1.623±1.000 |  | 1.286±0.300 |  | 2.752±0.829 |  | 5.050±0.525 |  | 5.153±0.336 |  |
|  | T/T | 4.527±1.044 |  | 1.789±1.347 |  | 1.262±0.361 |  | 2.633±0.887 |  | 5.015±0.533 |  | 5.136±0.359 |  |
| rs9460546 | T/G | 4.488±1.073 | 0.639 | 1.773±1.451 | 0.539 | 1.293±0.415 | 0.417 | 2.59±0.828 | 0.237 | 4.986±0.521 | 0.358 | 5.135±0.336 | 0.635 |
|  | G/G | 4.568±0.989 |  | 1.666±1.020 |  | 1.286±0.309 |  | 2.705±0.795 |  | 5.043±0.525 |  | 5.160±0.338 |  |
|  | G/G | 4.576±1.034 |  | 1.763±1.506 |  | 1.282±0.312 |  | 2.648±0.855 |  | 5.028±0.487 |  | 5.149±0.332 |  |
| rs7756992 | A/G | 4.493±1.078 | 0.553 | 1.734±1.261 | 0.67 | 1.279±0.366 | 0.994 | 2.608±0.849 | 0.771 | 5.007±0.537 | 0.588 | 5.140±0.343 | 0.801 |
|  | A/A | 4.506±1.003 |  | 1.817±1.386 |  | 1.281±0.458 |  | 2.635±0.832 |  | 4.984±0.539 |  | 5.130±0.361 |  |
|  | T/T | 4.512±1.064 |  | 1.717±1.173 |  | 1.288±0.353 |  | 2.596±0.853 |  | 5.016±0.524 |  | 5.148±0.341 |  |
| rs1111875 | T/C | 4.549±1.043 | 0.213 | 1.851±1.590 | 0.056 | 1.282±0.407 | 0.203 | 2.654±0.852 | 0.474 | 5.004±0.528 | 0.397 | 5.134±0.346 | 0.394 |
|  | C/C | 4.323±0.956 |  | 1.549±0.972 |  | 1.208±0.416 |  | 2.660±0.742 |  | 4.933±0.530 |  | 5.096±0.37 |  |
|  | T/T | 4.521±1.037 |  | 1.735±1.265 |  | 1.291±0.388 |  | 2.625±0.857 |  | 5.001±0.530 |  | 5.140±0.350 |  |
| rs5015480 | C/T | 4.528±1.085 | 0.203 | 1.842±1.566 | 0.050 | 1.261±0.372 | 0.355 | 2.634±0.833 | 0.620 | 5.020±0.516 | 0.793 | 5.136±0.326 | 0.966 |
|  | C/C | 4.165±0.872 |  | 1.501±0.626 |  | 1.233±0.24 |  | 2.482±0.691 |  | 4.978±0.538 |  | 5.152±0.429 |  |
|  | A/A | 4.499±1.062 |  | 1.729±1.306 |  | 1.288±0.399 |  | 2.613±0.838 |  | 5.010±0.541 |  | 5.145±0.345 |  |
| rs7923837 | A/G | 4.555±0.996 | 0.409 | 1.816±1.440 | 0.540 | 1.275±0.360 | 0.524 | 2.637±0.837 | 0.843 | 5.002±0.512 | 0.949 | 5.134±0.336 | 0.622 |
|  | G/G | 4.370±1.318 |  | 1.715±1.160 |  | 1.231±0.288 |  | 2.659±1.003 |  | 4.991±0.450 |  | 5.103±0.411 |  |
